# Supplementary material for: Interaction between the Number of Chemotherapy Cycles and Brachytherapy Dose/Volume Parameters in Locally Advanced Cervical Cancer Patients
Source: PubMed Central journal article supplement (PMC7356737; doi:10.3390/jcm9061653), 2020-06-01
Supplement: jcm-09-01653-s001.pdf [file jcm-09-01653-s001.pdf]

**Table S1. Characteristics of patients after propensity score matching on FIGO stage, CTV<sub>HR</sub> volume, and D<sub>90</sub>CTV<sub>HR</sub> dose.**

| Covariates                                              |      | 4 Cycles Delivered | 5 Cycles Delivered | <i>p</i> -Value |
|---------------------------------------------------------|------|--------------------|--------------------|-----------------|
| Patients                                                |      |                    |                    |                 |
| Age (years)                                             |      | 47.0 (42.0–53.7)   | 48.0 (40.5–55.0)   | 0.632           |
| Tobacco use                                             |      | 20/55 (36.4)       | 20/55 (36.4)       | 1.000           |
| PS                                                      | 0    | 23/55 (41.8)       | 32/55 (58.2)       | 0.229           |
|                                                         | 1    | 28/55 (50.9)       | 20/55 (41.7)       |                 |
|                                                         | 2    | 4/55 (7.3)         | 3/55 (5.5)         |                 |
| Tumors                                                  |      |                    |                    |                 |
| SCC                                                     |      | 48/55 (87.3)       | 46/55 (83.6)       | 0.788           |
| Poor differentiation                                    |      | 16/55 (29.1)       | 14/55 (25.5)       | 0.831           |
| FIGO stage                                              | IB1  | 0/55 (0.0)         | 0/55 (0.0)         | 0.197           |
|                                                         | IB2  | 17/55 (30.9)       | 12/55 (21.8)       |                 |
|                                                         | IIA  | 0/55 (0)           | 2/55 (3.6)         |                 |
|                                                         | IIB  | 21/55 (38.2)       | 26/55 (47.3)       |                 |
|                                                         | IIIA | 0/55 (0)           | 3/55 (5.5)         |                 |
|                                                         | IIIB | 9/55 (16.4)        | 4/55 (7.3)         |                 |
|                                                         | IVA  | 3/55 (5.5)         | 2/55 (3.6)         |                 |
|                                                         | IVB  | 5/55 (9.1)         | 6/55 (10.9)        |                 |
| Pelvic nodal metastases                                 |      | 23/55 (41.8)       | 22/55 (40)         | 1.000           |
| Neutrophilia at diagnosis                               |      | 13/43 (30.2)       | 12/42 (28.6)       | 1.000           |
| Treatments                                              |      |                    |                    |                 |
| Overall treatment time (days)                           |      | 47 (43–52)         | 47 (45–51)         | 0.441           |
| Cycle during IGABT                                      |      | 21/55 (38.2)       | 29/55 (52.7)       | 0.180           |
| CTV <sub>HR</sub> volume (cm <sup>3</sup> )             |      | 26.6 (18.5–40.9)   | 21.4 (16.3–28.1)   | 0.503           |
| D <sub>90</sub> CTV <sub>IR</sub> (Gy <sub>EQD2</sub> ) |      | 67.2 (60.8–70.0)   | 68.3 (64.1–70.8)   | 0.279           |
| D <sub>90</sub> CTV <sub>HR</sub> (Gy <sub>EQD2</sub> ) |      | 78.7 (74.0–86.1)   | 78.8 (72.1–87.7)   | 0.874           |
| TRAK                                                    |      | 1.80 (1.58–1.96)   | 1.77 (1.52–2.01)   | 0.917           |

FIGO: Fédération Internationale de Gynécologie Obstétrique; CTV<sub>HR</sub>: high risk clinical target volume; TRAK : Total Reference Air Kerma; PS: performance status.

**Table S2. Restricted mean survival time analysis estimating the life expectancy benefit afforded by an additional cycle after propensity score matching (*n* = 110).**

| <b>Propensity Score Matching (<i>n</i> = 110)</b> |                      |              |                       |
|---------------------------------------------------|----------------------|--------------|-----------------------|
| <b>Endpoint</b>                                   | <b>Gain in Years</b> | <b>95%CI</b> | <b><i>p</i>-Value</b> |
| OS                                                | 1.1                  | -0.0–2.3     | 0.052                 |
| PFS                                               | 1.4                  | 0.1–2.7      | 0.034*                |
| LFS                                               | 1.3                  | 0.1–2.5      | 0.038*                |
| RFS                                               | 1.4                  | 0.2–2.6      | 0.021*                |
| LRFS                                              | 1.5                  | 0.3–2.7      | 0.017*                |
| MFS                                               | 1.3                  | 0.1–2.5      | 0.039*                |
| LC                                                | 0.5                  | -0.5–1.6     | 0.323                 |
| LRC                                               | 1.3                  | 0.1–2.5      | 0.034*                |
| DMC                                               | 1.1                  | -0.1–2.3     | 0.064                 |

OS: overall survival; PFS: progression-free survival; LFS: local failure-free survival; RFS: regional failure-free survival; LRFS: locoregional failure-free survival; DMFS: distant metastasis failure-free survival; DMC: distant metastatic control; LC: local control; LRC: locoregional control; \*significant comparison; CI: confidence interval.
